# Supplementary material
Source: bioRxiv or medRxiv preprint supplement (https://www.biorxiv.org/highwire/filestream/94511/field_highwire_adjunct_files/0/306860-1.pdf)
Supplement: Supplementary file [file 306860-1.pdf]

# Longitudinal tracking of *Plasmodium falciparum* clones in complex infections by amplicon deep sequencing

Anita Lerch, Cristian Koepfli, Natalie E. Hofmann, Johanna H. Kattenberg, Anna Rosanas-Urgell, Inoni Betuela, Ivo Mueller, Ingrid Felger

## Supplemental Material

| Table of Contents:                                | page      |
|---------------------------------------------------|-----------|
| <b>Supplemental Figures</b>                       | <b>2</b>  |
| <b>Supplemental Tables</b>                        | <b>9</b>  |
| <b>Supplemental Text S1</b>                       | <b>16</b> |
| <i>Example of multi-locus haplotype inference</i> | <i>16</i> |

## Supplemental Figures

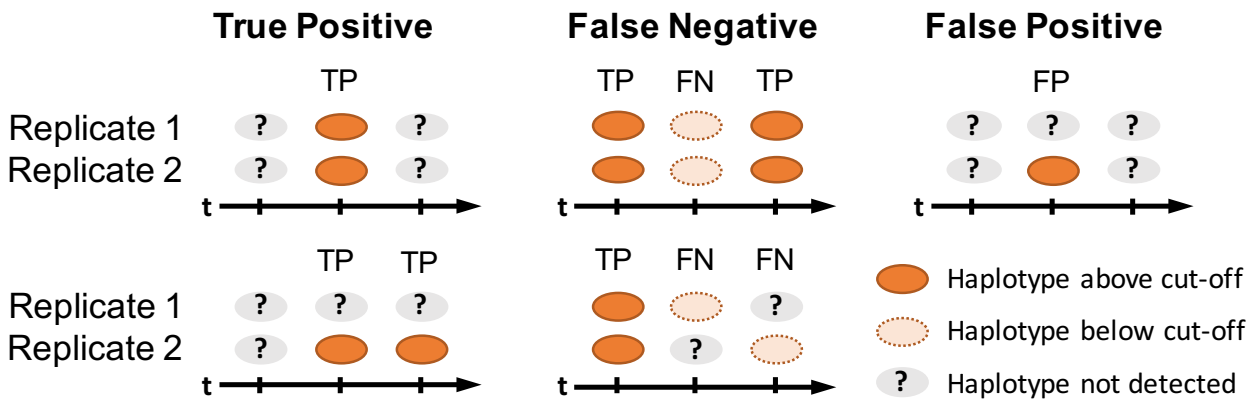

**Supplementary Figure S1: Schematic of haplotype classification.** Examples show the classification of haplotypes in true-positive (TP), false-negative (FN) and false-positive (FP), based on their detection either in duplicates or in the preceding or succeeding bleeds.

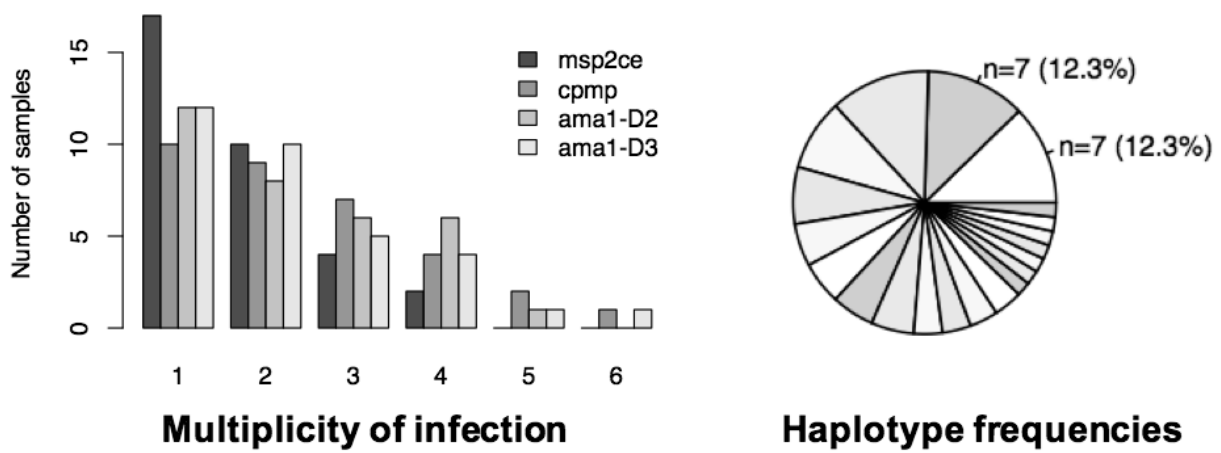

**Supplementary Figure S2: Frequency distribution of multiplicity of infection by marker (left) and frequency of *msp2*-CE haplotypes (right) in 33 baseline samples. Marker *msp2*-CE identified 20 different haplotypes. (Frequency distribution of haplotypes of Amp-Seq markers given in Figure 1).**

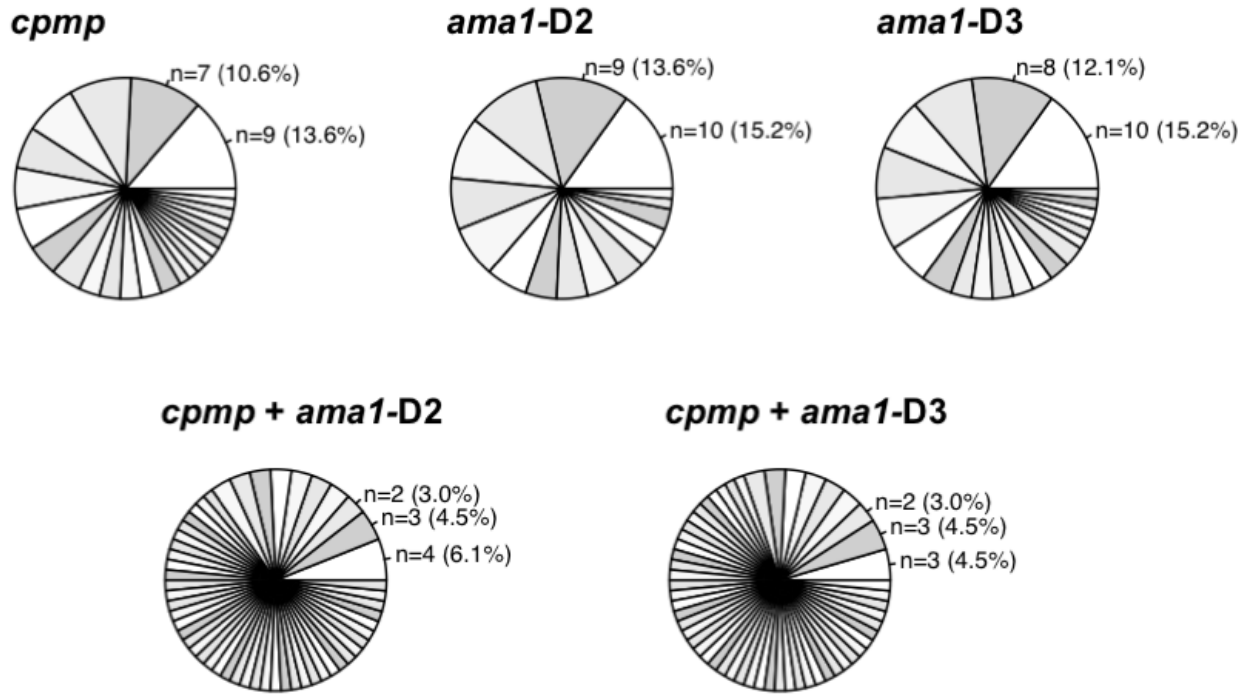

**Supplementary Figure S3:** Haplotype frequencies by marker in 46 independent samples comprising 66 clones. For marker *cpmp* 25 different alleles were identified, for *ama1-D2* 16 haplotypes and for *ama1-D3* 21 haplotypes. Top panel: haplotypes base on single markers; bottom panel: two-marker haplotypes.

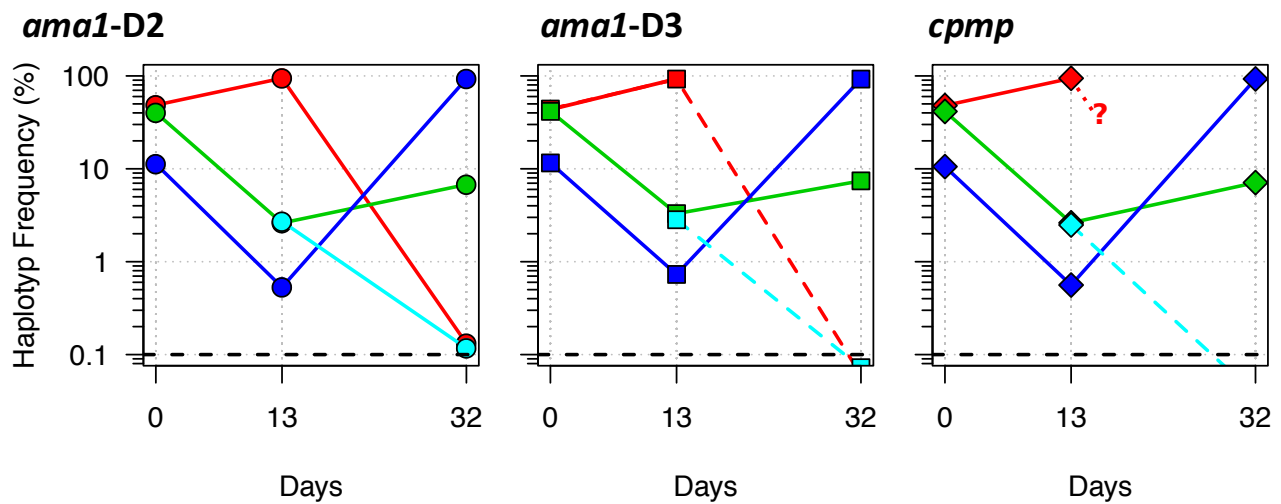

| Days | Clone 1 |      |      | Clone 2 |      |      | Clone 3 |      |      | Clone 4 |      |      |
|------|---------|------|------|---------|------|------|---------|------|------|---------|------|------|
|      | ●       | ■    | ◆    | ●       | ■    | ◆    | ●       | ■    | ◆    | ●       | ■    | ◆    |
| 0    | 48.5    | 44.0 | 48.0 | 40.2    | 41.5 | 41.4 | 11.3    | 11.6 | 10.6 | -       | -    | -    |
| 13   | 94.4    | 92.6 | 94.3 | 2.61    | 3.29 | 2.62 | 0.53    | 0.73 | 0.56 | 2.71    | 2.83 | 2.49 |
| 32   | 0.13    | 0.06 | n.d. | 6.77    | 7.42 | 7.10 | 93.1    | 92.5 | 92.9 | 0.12    | 0.07 | 0.04 |

**Supplementary Figure S4: Within-host haplotype frequencies of Amp-Seq markers in longitudinal samples from one child.** Inserted table lists within-host multi-locus haplotype frequencies in percent. Multi-locus haplotypes have the same colour-code in figures and table. Solid line represents persisting haplotypes above cut-off criteria (true-positive haplotypes). Dashed line represents persisting haplotypes falling below cut-off criteria (false-negative haplotypes detected below cut-off criteria). Dotted line and question mark indicate a false-negative haplotype that was not detected (n.d.) but could be imputed based on the established multi-locus haplotypes from the preceding sample. Black dashed line represents cut-off criteria of the Amp-Seq genotyping method.

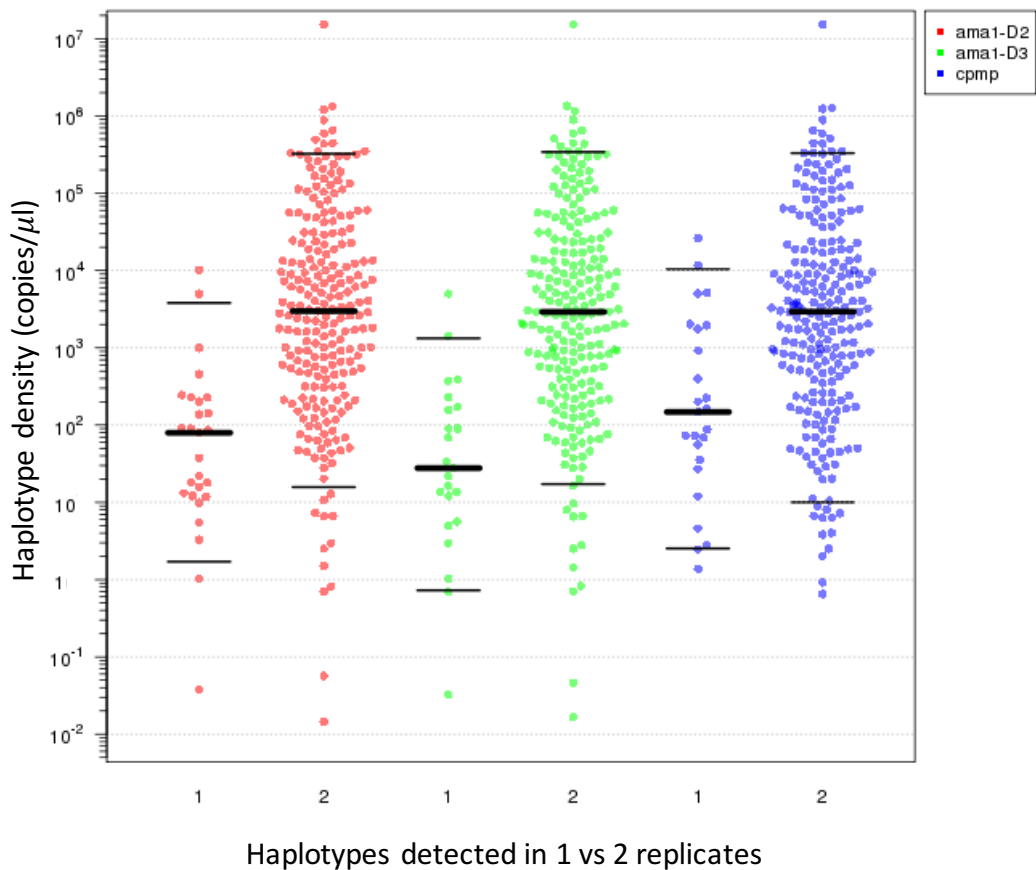

**Supplementary Figure S5: Density of true-positive haplotypes detected in only one or both replicates.** X-axis, haplotypes detected in 1 versus 2 replicates by Amp-Seq marker. Y-axis, haplotype density by qPCR measured as 18S rRNA gene copies per  $\mu\text{l}$  whole blood. Points represent individual haplotypes; colours represent individual markers. Black horizontal bar represents 5, 50 and 95-percentile. Wilcoxon rank sum test with continuity correction:  $W=1000$  and  $p\text{-value}=2 \times 10^{-9}$  for *ama1-D2*,  $W=700$  and  $p\text{-value}=5 \times 10^{-9}$  for *ama1-D3*,  $W=1000$  and  $p\text{-value}=5 \times 10^{-5}$  for *cpmp*.

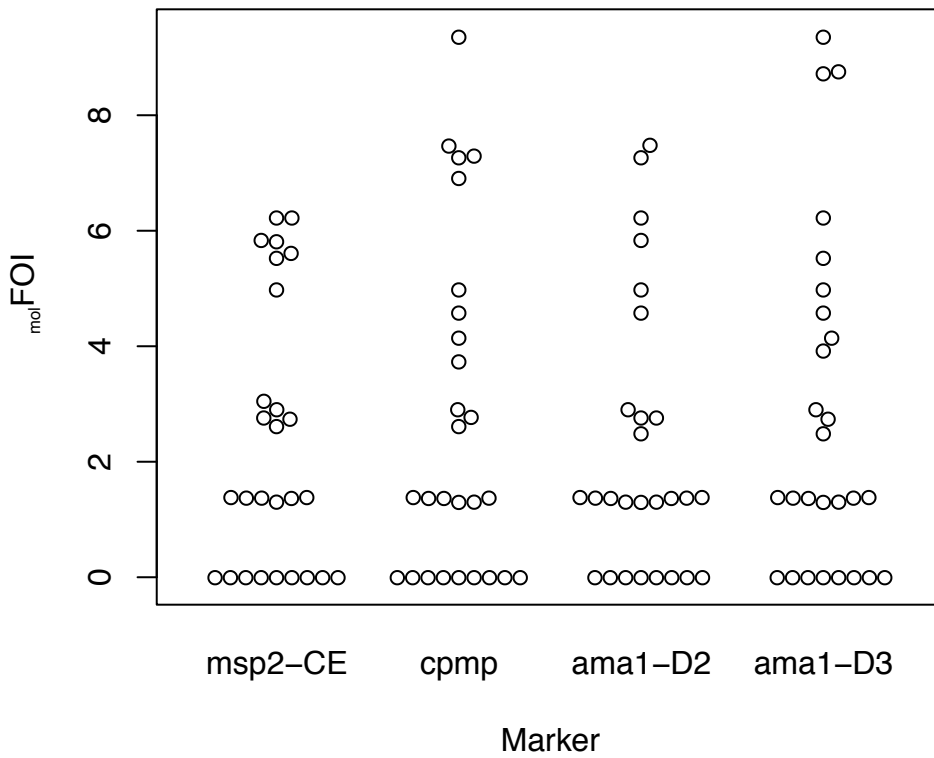

**Supplementary Figure S6: Frequency distribution of molecular force of infection ( $_{mol}FOI$ ) by marker.** A total of 117 samples from 27 individuals (on average 4.3 samples per individual [min: 2, max: 7]) were used to estimate force of infection (FOI).

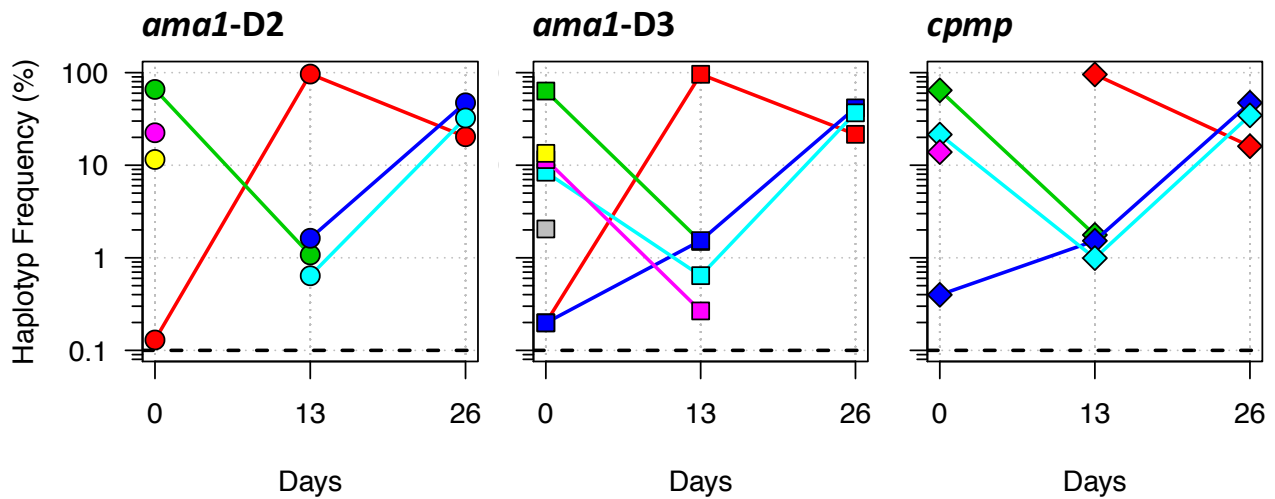

| Multi-locus<br>haplotype<br>names | Day 0               |                     |                  | Day 13              |                     |                  | Day 32              |                     |                  |
|-----------------------------------|---------------------|---------------------|------------------|---------------------|---------------------|------------------|---------------------|---------------------|------------------|
|                                   | <i>ama1-D2</i><br>% | <i>ama1-D3</i><br>% | <i>cpmp</i><br>% | <i>ama1-D2</i><br>% | <i>ama1-D3</i><br>% | <i>cpmp</i><br>% | <i>ama1-D2</i><br>% | <i>ama1-D3</i><br>% | <i>cpmp</i><br>% |
| Haplotype 1                       | 65.9                | 63.3                | 64.4             | 1.1                 | 1.5                 | 1.8              |                     |                     |                  |
| Haplotype 2                       | 0.1                 | 0.2                 |                  | 96.6                | 96                  | 95.6             | 20.3                | 21.6                | 16.1             |
| Haplotype 3                       |                     | 0.2                 | 0.4              | 1.6                 | 1.5                 | 1.5              | 47.3                | 41.6                | 47.2             |
| Haplotype 4                       |                     | 8.4                 | 21.4             | 0.6                 | 0.6                 | 1                | 32.4                | 36.8                | 34.6             |
| Haplotype 5                       | 22.4                |                     |                  |                     |                     |                  |                     |                     |                  |
| Haplotype 6                       | 11.5                |                     |                  |                     |                     |                  |                     |                     |                  |
| Haplotype 7                       |                     | 11.5                |                  |                     | 0.3                 |                  |                     |                     |                  |
| Haplotype 8                       |                     | 13.4                |                  |                     |                     |                  |                     |                     |                  |
| Haplotype 9                       |                     | 2.0                 |                  |                     |                     |                  |                     |                     |                  |
| Haplotype 10                      |                     |                     | 13.9             |                     |                     |                  |                     |                     |                  |

**Supplementary Figure S7: Within-host haplotype frequency of Amp-Seq markers in longitudinal samples from 1 child representing an unresolvable multi-locus haplotype.**

Inserted table lists within-host haplotype frequencies for all markers with a possible solution of partly established multi-locus haplotypes for the major haplotypes. Multi-locus haplotypes 1-3 match well in frequencies of individual haplotypes at day 0, 13 and 32. In contrast, multi-locus haplotype 4 does not match in frequencies of individual haplotypes at day 0. This could be explained by a complex shared haplotype situation with one or several clones detected only at day 0 and 13, e.g. haplotypes 5-10. Solid lines represent persisting haplotypes.



## Supplemental Tables

**Supplementary Table S1:** PCR Primer sequence for Amp-Seq and *msp2*-CE genotyping and sequence library preparation.

---

| <b>Primer for primary PCR</b> |                     |
|-------------------------------|---------------------|
| cpmp_prim_F                   | CGATACAGGACATATAGA  |
| cpmp_prim_R                   | TTCAATAACATTTACTAGG |
| Pfama1_F5                     | TGCGTATTATTATTGAGC  |
| Pfama1_R613                   | GTGTTGTATGTGATGCTC  |

---

| <b>Primer for nested PCR</b> |                                                         |
|------------------------------|---------------------------------------------------------|
| ama1_D2_F_Linkers            | GTGACCTATGAACTCAGGAGTC <b>GGTCCTAGATATTGTAATAAAG</b>    |
| ama1_D2_R_Linkers            | CTGAGACTTGCACATCGCAGCC <b>CATGTTGGTTTGACATTA</b> AA     |
| ama1_D3_F_Linkers            | GTGACCTATGAACTCAGGAGTCT <b>ACTACTGCTTTGTCCCATC</b>      |
| ama1_D3_R_Linkers            | CTGAGACTTGCACATCGCAGCT <b>CAGGATCTAACATTT</b> CATC      |
| cpmp_F_Linkers               | GTGACCTATGAACTCAGGAGT <b>CCATAAGTCATTAAAATTTATGGAT</b>  |
| cpmp_R_Linkers               | CTGAGACTTGCACATCGCAGCC <b>CGTTACTATCAAGATCGTTAATATC</b> |

---

| <b>Primer for <i>msp2</i> CE genotyping</b> |                           |
|---------------------------------------------|---------------------------|
| msp2_S2_fw                                  | GAAGGTAATTAAAACATTGTC     |
| msp2_S3_rev                                 | GAGGGATGTTGCTGCTCCACAG    |
| msp2_S1-fw                                  | GCTTATAATATGAGTATAAGGAGAA |
| msp2_FC27-rev                               | GCATTGCCAGAACTTGAA        |
| msp2_3D7-rev                                | CTGAAGAGGTACTGGTAGA       |

---

| <b>Primer for sequence library PCR (XXXXXX=barcode)</b> |                                                                                                   |
|---------------------------------------------------------|---------------------------------------------------------------------------------------------------|
| Forward                                                 | AATGATACGGCGACCACCGAGATCTACACTCTTCCCTACACGACGC<br>TCTTCCGATCTXXXXXXXXXXGTGACCTATGAACTCAGGAGTC     |
| Reverse                                                 | CAAGCAGAAGACGGCATAACGAGATCGGTCTCGGCATTCCTGCTGAAC<br>CGCTCTTCCGATCTXXXXXXXXXXCTGAGACTTGCACATCGCAGC |

---

| <b>Forward barcode</b> |          | <b>Reverse barcode</b> |           |
|------------------------|----------|------------------------|-----------|
| Fwd_1                  | TAGATCGC | Rev_1                  | TAAGGCGA  |
| Fwd_2                  | CTCTCTAT | Rev_2                  | CGTACTAG  |
| Fwd_3                  | TATCCTCT | Rev_3                  | AGGCAGAA  |
| Fwd_4                  | AGAGTAGA | Rev_4                  | TCCTGAGC  |
| Fwd_5                  | GTAAGGAG | Rev_5                  | GGA CTCCT |
| Fwd_6                  | ACTGCATA | Rev_6                  | TAGGCATG  |
| Fwd_7                  | AAGGAGTA | Rev_7                  | CTCTCTAC  |
| Fwd_8                  | CTAAGCCT | Rev_8                  | CAGAGAGG  |
| Fwd_13                 | TGGTGGTA | Rev_9                  | GCTACGCT  |
| Fwd_14                 | TTCACGCA | Rev_10                 | CGAGGCTG  |
| Fwd_15                 | AGCACCTC | Rev_11                 | AAGAGGCA  |
| Fwd_16                 | CAAGGAGC | Rev_12                 | GTAGAGGA  |
| Fwd_17                 | ATTGGCTC | Rev_13                 | ATGCCTAA  |
| Fwd_18                 | CACCTTAC | Rev_14                 | ACGCTCGA  |
| Fwd_19                 | CTAAGGTC | Rev_15                 | AGTCACTA  |
| Fwd_20                 | GAACAGGC | Rev_16                 | ATCCTGTA  |
|                        |          | Rev_17                 | CGCATACA  |
|                        |          | Rev_18                 | CTGGCATA  |
|                        |          | Rev_19                 | GATAGACA  |
|                        |          | Rev_20                 | GCTAACGA  |
|                        |          | Rev_21                 | GTGTTCTA  |
|                        |          | Rev_22                 | TCCGTCTA  |
|                        |          | Rev_23                 | CCTAATCC  |
|                        |          | Rev_24                 | GACAGTGC  |

**Supplementary Table S2:** Location and size of the amplicons.

|             | <i>cpmp</i> | <i>ama1-D2</i> | <i>ama1-D3</i> |
|-------------|-------------|----------------|----------------|
| <b>From</b> | 1895        | 775            | 1281           |
| <b>To</b>   | 2324        | 1253           | 1796           |
| <b>Size</b> | 430         | 479            | 516            |

**Supplementary Table S3:** Summary of sequence coverage (total read numbers) by Amp-Seq marker.

|                | <i>cpmp</i> | <i>ama1-D2</i> | <i>ama1-D3</i> |
|----------------|-------------|----------------|----------------|
| <b>1st Qu.</b> | 247         | 2292           | 2997           |
| <b>Median</b>  | 794         | 3386           | 4716           |
| <b>Mean</b>    | 1117        | 3682           | 5189           |
| <b>3rd Qu.</b> | 1632        | 5143           | 6906           |
| <b>Max</b>     | 6376        | 11570          | 34240          |

**Supplementary Table S4:** Summary of multi-locus haplotype (MLH) inference based on longitudinal samples from 33 children.

| Status of MLH inference                    | Samples<br>n    | Multi-locus<br>haplotypes<br>n | Single-locus haplotypes |                     |                     |
|--------------------------------------------|-----------------|--------------------------------|-------------------------|---------------------|---------------------|
|                                            |                 |                                | <i>cpmp</i><br>n        | <i>ama1-D2</i><br>n | <i>ama1-D3</i><br>n |
| <b>Full established MLH</b>                | 78 <sup>1</sup> | 116 <sup>1</sup>               | 116                     | 103                 | 103                 |
| <b>Partly established MLH</b> <sup>2</sup> | 49              | 64                             | 135                     | 130                 | 126                 |
| <b>Unresolvable MLH</b> <sup>3</sup>       | 8               | 0                              | 20                      | 18                  | 18                  |
| <b>Incomplete datasets</b> <sup>4</sup>    | 13              | 0                              | 7                       | 11                  | 11                  |
| <b>Total</b>                               | 140             | 180                            | 258 <sup>5</sup>        | 244 <sup>5</sup>    | 240 <sup>5</sup>    |

n number of samples or haplotypes.

<sup>1</sup> 45 out of 78 samples with fully established multi-locus haplotypes were single clone infections.

<sup>2</sup> Samples where multi-locus haplotypes could be established for some but not for all clones of a sample.

<sup>3</sup> Samples where no multi-locus haplotype could be established.

<sup>4</sup> Samples with missing genotyping results for any of the markers.

<sup>5</sup> Total number of parasite clones detected in 140 samples was 277.

**Supplementary Table S5:** Overview of sample selection criteria applied for different types of analyses.

| <b>Analysis Type</b>                       | <b>Samples</b> | <b>Children</b> | <b>Selection Criteria</b>                                                                                                                                               |
|--------------------------------------------|----------------|-----------------|-------------------------------------------------------------------------------------------------------------------------------------------------------------------------|
|                                            | <b>n</b>       | <b>n</b>        |                                                                                                                                                                         |
| Baseline H <sub>e</sub><br>and MOI         | 33             | 33              | Baseline (or first bleed available) sample.                                                                                                                             |
| Multi-locus H <sub>e</sub>                 | 46             | 33              | Samples with a resolvable multi-locus haplotype that were separated by a treatment plus $\geq 2$ consecutive <i>P. falciparum</i> negative samples from the same child. |
| <sub>mol</sub> FOI                         | 117            | 27              | Children with a complete set of replicates.                                                                                                                             |
| Sensitivity and<br>false discovery<br>rate | 48             | 12              | Children that did not received antimalarial treatment during the timespan analysed and harboured at least one haplotype that was detected at 3 consecutive bleeds.      |
| Reproducibility                            | 139            | 33              | True-positive haplotypes.                                                                                                                                               |

**Supplementary Table S6: Numbers of missed haplotypes due to imperfect detection either at baseline, in any intermediate sample, or prior to haplotype clearance.** Haplotypes from 48 longitudinal samples from 12 children were classified into true-positive (TP) and false-negative haplotypes. Two types of false-negative haplotypes (missed clones) can be differentiated: (FN<sub>i</sub>) False-negative haplotypes detected but below cut-off criteria and (FN<sub>ii</sub>) false-negative haplotypes not detected but imputed.

| Marker                            | Baseline sample  | Any intermediate sample | Sample prior to clearance |
|-----------------------------------|------------------|-------------------------|---------------------------|
|                                   | n                | n                       | n                         |
| <b>TP haplotypes</b>              |                  |                         |                           |
| <i>msp2-CE</i>                    | 29               | 34                      | 23                        |
| <i>cpmp</i>                       | 39               | 45                      | 31                        |
| <i>ama1-D2</i>                    | 36               | 44                      | 29                        |
| <i>ama1-D3</i>                    | 36               | 43                      | 29                        |
| <b>FN<sub>i</sub> haplotypes</b>  |                  |                         |                           |
| <i>msp2-CE</i>                    | 2                | 6                       | 2                         |
| <i>cpmp</i>                       | 1                | 0                       | 3                         |
| <i>ama1-D2</i>                    | 0                | 1                       | 2                         |
| <i>ama1-D3</i>                    | 1                | 0                       | 3                         |
| <b>FN<sub>ii</sub> haplotypes</b> |                  |                         |                           |
| <i>msp2-CE</i>                    | n/a <sup>1</sup> | 5                       | n/a <sup>1</sup>          |
| <i>cpmp</i>                       | 0                | 2                       | 1                         |
| <i>ama1-D2</i>                    | 1                | 0                       | 0                         |
| <i>ama1-D3</i>                    | 1                | 2                       | 0                         |

<sup>1</sup> FN<sub>ii</sub> haplotypes cannot be imputed at the beginning of infection or prior to clearance for marker *msp2-CE*.

**Supplementary Table S7:** Reproducibility of true-positive haplotypes in technical replicates.

Reproducibility only decreased when clone densities fell below 1000 copies 18S rRNA gene per  $\mu\text{l}$  whole blood and/or within-host frequency below 1% (FIG S5).

|                                                            | <i>cpmp</i> |       |       | <i>ama1-D2</i> |       |       | <i>ama1-D3</i> |       |       |
|------------------------------------------------------------|-------------|-------|-------|----------------|-------|-------|----------------|-------|-------|
|                                                            | $n_1$       | $n_2$ | q     | $n_1$          | $n_2$ | q     | $n_1$          | $n_2$ | q     |
|                                                            | 25          | 235   | 0.949 | 28             | 228   | 0.942 | 23             | 226   | 0.952 |
| <b>Haplotype density (copies/<math>\mu\text{l}</math>)</b> |             |       |       |                |       |       |                |       |       |
| >1000                                                      | 7           | 148   | 0.977 | 2              | 146   | 0.993 | 2              | 142   | 0.993 |
| 100-1000                                                   | 6           | 52    | 0.945 | 8              | 50    | 0.926 | 5              | 51    | 0.953 |
| 10-100                                                     | 8           | 23    | 0.852 | 13             | 22    | 0.772 | 10             | 22    | 0.815 |
| <10                                                        | 4           | 12    | 0.857 | 5              | 10    | 0.800 | 6              | 11    | 0.786 |
| <b>Haplotype proportion within a sample (%)</b>            |             |       |       |                |       |       |                |       |       |
| >10                                                        | 13          | 172   | 0.964 | 16             | 165   | 0.954 | 11             | 167   | 0.968 |
| 1-10                                                       | 4           | 55    | 0.965 | 4              | 47    | 0.959 | 5              | 46    | 0.948 |
| <1                                                         | 8           | 8     | 0.667 | 8              | 16    | 0.800 | 7              | 13    | 0.788 |

$n_1$  number of clones detected only with one of the replicates.

$n_2$  number of clones detected with both replicates.

q detectability as described in Bretscher et al. 2010.

# Supplemental Text S1

## Example of multi-locus haplotype inference

Below an example of *P. falciparum* infection dynamics is shown for one child in great detail to illustrate our strategy for inferring a multi-locus haplotype that combines SNP data from three molecular markers *ama1-D2*, *ama1-D3*, and *cpmp*. Within-host haplotype frequency data of the example is shown in Table S8 and corresponding graphic illustration in FIG S7.

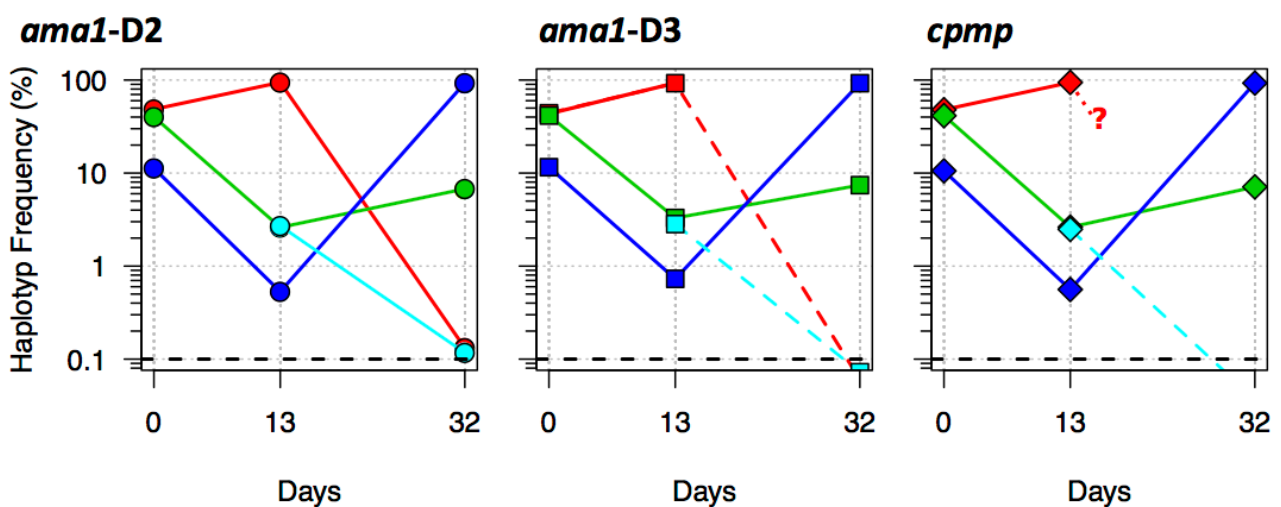

**Supplementary Figure S8: Within-host haplotype frequencies of Amp-Seq markers in longitudinal samples from one child.** Multi-locus haplotypes have the same colour-code in figures. Solid line represents persisting haplotypes above cut-off criteria (true-positive haplotypes). Dashed line represents persisting haplotypes falling below cut-off criteria (false-negative haplotypes detected below cut-off criteria). Dotted line and question mark indicate a false-negative haplotype that was not detected but could be imputed based on the established multi-locus haplotypes from the preceding sample. Black dashed line represents cut-off criteria of the Amp-Seq genotyping method.



**Supplementary Table S8:** Within-host haplotype frequencies (WHHF) in percent of individual Amp-Seq markers observed in longitudinal samples from one child. Haplotypes of individual markers (termed alleles) are sorted by WHHF of day 0. **Haplotypes 1-4** represent multi-loci haplotypes composed of one allele of each of the 3 markers.

| Multi-locus<br>haplotype<br>names | Day 0          |                |             | Day 13         |                |             | Day 32         |                |             |
|-----------------------------------|----------------|----------------|-------------|----------------|----------------|-------------|----------------|----------------|-------------|
|                                   | <i>ama1-D2</i> | <i>ama1-D3</i> | <i>cpmp</i> | <i>ama1-D2</i> | <i>ama1-D3</i> | <i>cpmp</i> | <i>ama1-D2</i> | <i>ama1-D3</i> | <i>cpmp</i> |
|                                   | %              | %              | %           | %              | %              | %           | %              | %              | %           |
| <b>Haplotype 1</b>                | 48.5           | 44.0           | 48.0        | 94.4           | 92.6           | 94.3        | 0.13           | 0.06           |             |
| <b>Haplotype 2</b>                | 40.2           | 41.5           | 41.4        | 2.61           | 3.29           | 2.62        | 6.77           | 7.42           | 7.10        |
| <b>Haplotype 3</b>                | 11.3           | 11.6           | 10.6        | 0.53           | 0.73           | 0.56        | 93.1           | 92.5           | 92.9        |
| <b>Haplotype 4</b>                | -              | -              | -           | 2.71           | 2.83           | 2.49        | 0.12           | 0.07           | 0.04        |

The inference of multi-marker haplotypes started with identification of alleles that belong to the dominant parasite clone. A dominant Haplotype was defined by a within-host haplotype frequencies (WHHF) >54%.

#### Inference of multi-marker Haplotypes at Day 0

At Day 0 of this example, 2 different alleles per marker occurred at similar WHHF (listed by marker in Supplemental Table S8). At Day 0 no dominant Haplotype was evident, therefore any increase or decrease of in WHHF of these alleles at Day13 was interrogated: one allele of each of the 3 markers showed an increase of approx. +46%, while the remaining 3 alleles of similar frequency revealed a decrease by approx. -38%. Based on these recoded frequency changes we combined those alleles from each marker, which all increased by approx. +46%, into multi-locus **Haplotype 1** (Supplementary Figure S8, Day 0 in red).

Alleles that constituted **Haplotype 1** were not considered in next steps of inference. Additional multi-locus haplotypes of Day 0 were inferred by combining the alleles of similar frequency which showed a decrease in WHHF for all 3 markers of approx. -38%, thus defining multi-locus **Haplotype 2** (Supplementary Figure S8, Day 0 in green). For the next steps of inference, all alleles associated with multi-locus **Haplotypes 1** and **2** were no more considered. The remaining alleles

constituted multi-locus **Haplotype 3** with ~11% WHHF for all markers (Supplementary Figure S8, Day 0 in blue).

#### Multi-marker Haplotypes at Day 13

The dominant alleles in all 3 markers of the Day 13 sample were consistent with multi-locus **Haplotype 1** characterized by ~93% WHHF for all 3 markers (Supplementary Figure S8, Day 13 in red). Again this multi-locus haplotype was no more considered in the next steps of Day 13 haplotype inference. Next two multi-locus haplotypes with similar WHHF were observed. In agreement with allele combinations found at Day 0, multi-locus **Haplotype 2** was identified by an increase of these alleles at Day 32 of approx. +4% (Supplementary Figure S8, Day 13 in green). After excluding alleles constituent multi-locus **Haplotypes 1** and **2** an additional new multi-locus **Haplotype 4** with similar WHHF as **Haplotype 2** was found (Supplementary Figure S8 Day 13 in light blue). The remaining alleles, all with frequencies below 1%, corresponded to multi-locus **Haplotype 3** (Supplementary Figure S8, Day 13 in blue).

#### Multi-marker Haplotypes at Day 32

The dominant clone in the Day 32 sample corresponds to multi-locus **Haplotype 3**, characterized in this sample by a steep increase of, ~93% WHHF for all markers (Supplementary Figure S8, Day 32 in blue). Alleles of this dominant clones are no more considered in the next step of inference. The dominant clone in this step corresponds to **Haplotype 2** with ~7% WHHF for all markers (Supplementary Figure S8, Day 32 in green). In the next step all alleles of **Haplotypes 3** and **2** were no more considered. But no further multi-locus haplotypes could be established, as WHHF of the remaining alleles were below the 0.1% WHHF cut-off criteria for some of the markers. However, as the inferred multi-locus haplotypes of Day 0, 13 and 32 match for all samples and marker ama1-D2 showed a WHHF above the cut-off criteria, the multi-locus Haplotypes **1** and **4** could be imputed (Supplementary Figure S8, Day 32 in light blue and red).
